# Supplementary material
Source: publisher figshare collection journal article supplement (https://frontiersin.figshare.com/ndownloader/files/18504848)

## Supporting Information

**Figure S1: Probability density functions for each of the four threats considered and lines representing the cut-off values for considering the risk associated with each threat as low (l), medium (m) or high (h).**

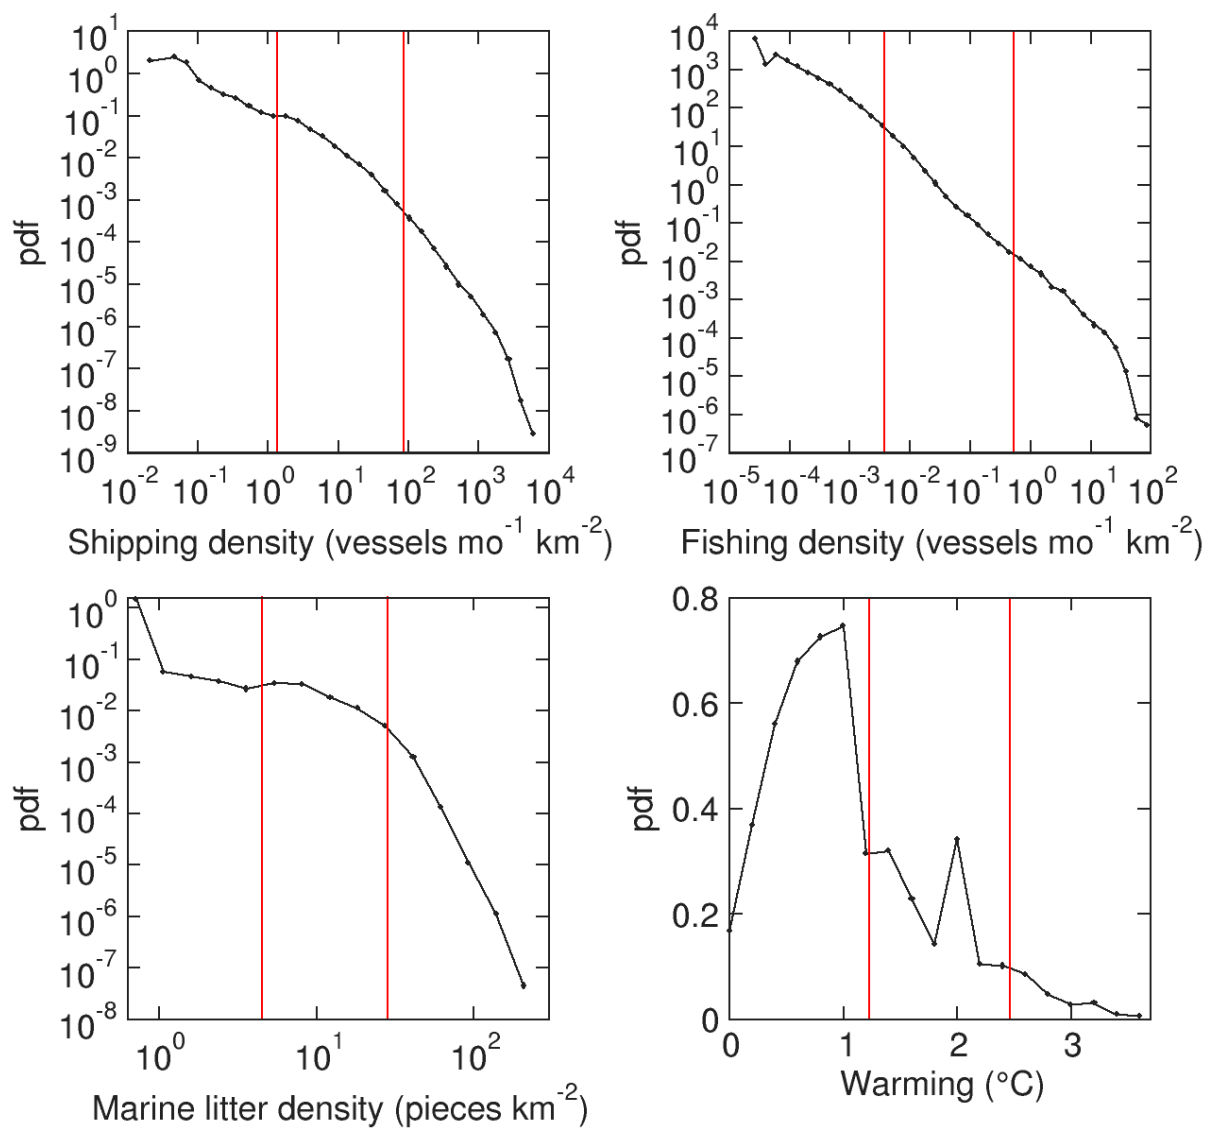

Supplement: Supplementary file 1 [file 18504848]
